# Supplementary material for: Odor Emissions Factors for Bitumen-Related Production Sites
Source: MDPI journal article supplement (doi:10.3390/app11083700), 2021-04-20
Supplement: s1 [file s1]

## Supplementary Material: Odor Emissions Factors for Bitumen-Related Production Sites

Enrico Davoli <sup>1\*</sup>, Giancarlo Bianchi<sup>1</sup>, Anna Bonura<sup>2</sup> Marzio Invernizzi<sup>3</sup> and Selena Sironi<sup>3</sup>

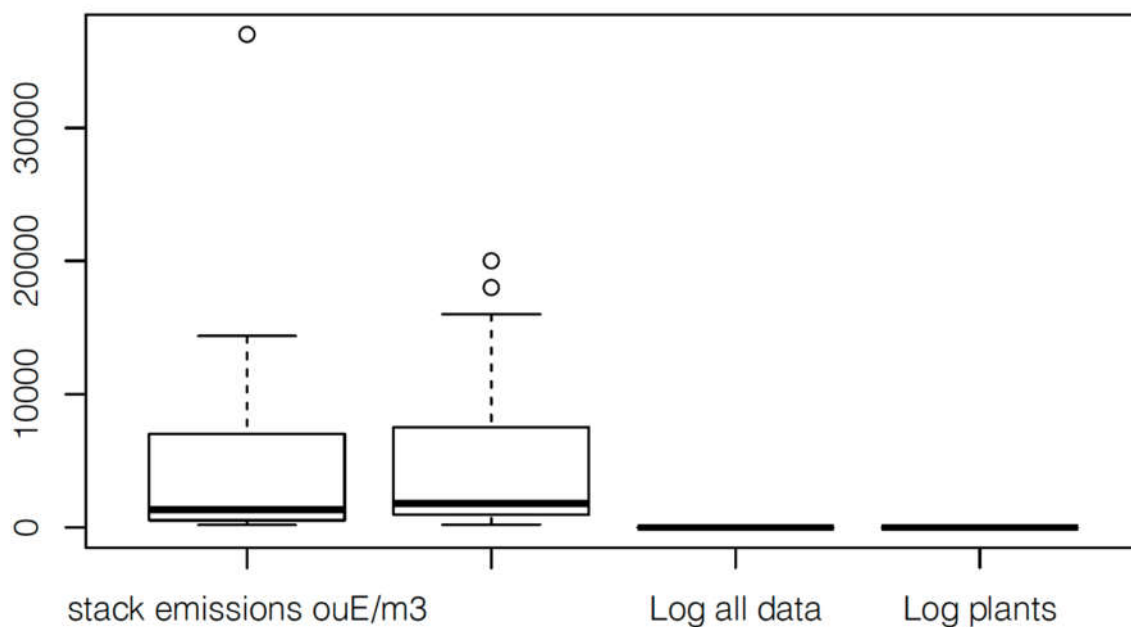

**Figure S1.** Overall view of raw data acquired. 85 bitumen-related production sites have been sampled.

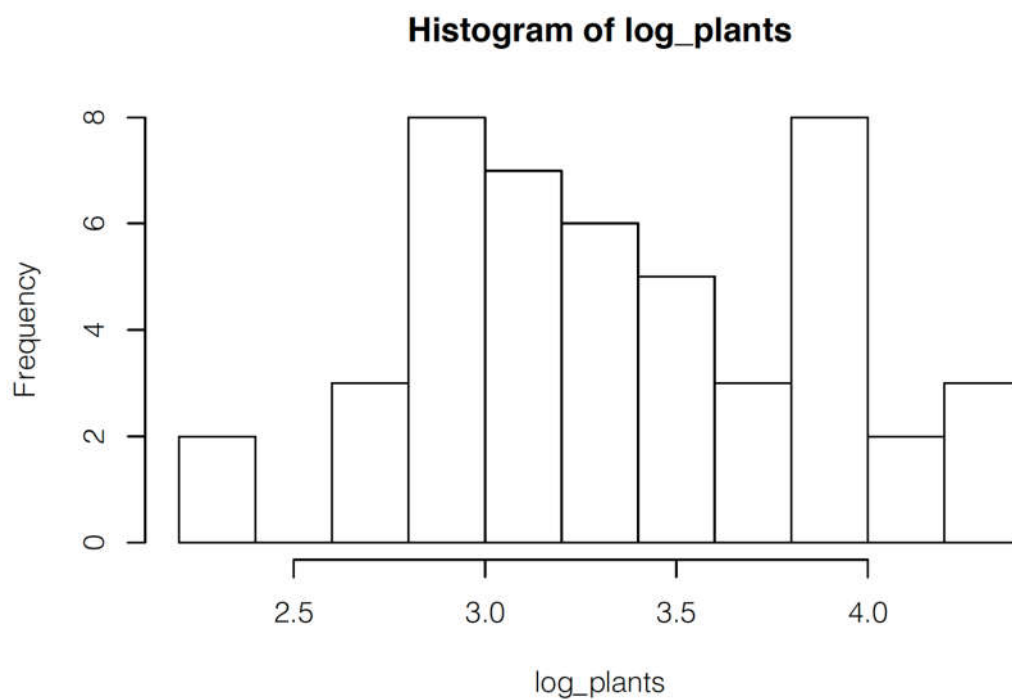

**Figure S2.** Overall view of raw data acquired. Distribution of odor concentration in stack emission for all bitumen-related production sites.

Table S1a. Complete raw dataset from bitumen related production sites acquired.

| Plant ID |                                 | all data ou <sub>f</sub> /m <sup>3</sup> | overall stack emissions ouE/m <sup>3</sup> | plants stack emissions ouE/m <sup>3</sup> | fugitive emissions ou <sub>f</sub> /m <sup>3</sup> | ambient air ou <sub>f</sub> /m <sup>3</sup> | plant filters ou <sub>f</sub> /m <sup>3</sup> | Q [m <sup>3</sup> /h] | OER [OUE/s] | Plant capacity [ton/year] | OEf ouE/ton |
|----------|---------------------------------|------------------------------------------|--------------------------------------------|-------------------------------------------|----------------------------------------------------|---------------------------------------------|-----------------------------------------------|-----------------------|-------------|---------------------------|-------------|
|          | n=                              | 113                                      | 85                                         | 47                                        | 12                                                 | 10                                          | 6                                             |                       | 8           |                           | 6           |
|          | mean                            | 4625                                     | 4135                                       | 4494                                      | 11085                                              | 130                                         | 6135                                          |                       | 1,0,E+05    |                           | 1,8,E+07    |
|          | median                          | 1400                                     | 1500                                       | 1800                                      | 1775                                               | 125                                         | 807                                           |                       | 8,4,E+04    |                           | 1,1,E+07    |
|          | RSD %                           | 7203                                     | 6779                                       | 10538                                     | 146497                                             | 569                                         | 165790                                        |                       | 1,3,E+06    |                           | 3,5,E+08    |
|          | Min                             | 60                                       | 200                                        | 240                                       | 964                                                | 60                                          | 198                                           |                       | 7,9,E+03    |                           | 1,8,E+06    |
|          | Max                             | 49000                                    | 37000                                      | 20000                                     | 49000                                              | 220                                         | 25000                                         |                       | 3,2,E+05    |                           | 5,8,E+07    |
| Plant ID | Emission type                   | all data ou <sub>f</sub> /m <sup>3</sup> | overall stack emissions ouE/m <sup>3</sup> | plants stack emissions ouE/m <sup>3</sup> | fugitive emissions ou <sub>f</sub> /m <sup>3</sup> | ambient air ou <sub>f</sub> /m <sup>3</sup> | plant filters ou <sub>f</sub> /m <sup>3</sup> | Q [m <sup>3</sup> /h] | OER [OUE/s] | Plant capacity [ton/year] | OEf ouE/ton |
| A        | stack emissions                 | 8700                                     | 8700                                       |                                           |                                                    |                                             |                                               |                       |             |                           |             |
|          | Loading trucks                  | 1900                                     |                                            |                                           | 1900                                               |                                             |                                               |                       |             |                           |             |
|          | Loading trucks                  | 35000                                    |                                            |                                           | 35000                                              |                                             |                                               |                       |             |                           |             |
|          | Tank venting                    | 49000                                    |                                            |                                           | 49000                                              |                                             |                                               |                       |             |                           |             |
|          | ambient air                     | 220                                      |                                            |                                           |                                                    | 220                                         |                                               |                       |             |                           |             |
|          | ambient air                     | 60                                       |                                            |                                           |                                                    | 60                                          |                                               |                       |             |                           |             |
| B        | average plant stack emissions   |                                          |                                            | 8700                                      |                                                    |                                             |                                               |                       |             |                           |             |
|          | stack emissions                 | 220                                      | 220                                        |                                           |                                                    |                                             |                                               | 24000                 |             | 60000                     |             |
|          | stack emissions                 | 320                                      | 320                                        |                                           |                                                    |                                             |                                               | 82500                 |             |                           |             |
|          | stack emissions                 | 610                                      | 610                                        |                                           |                                                    |                                             |                                               | 22500                 |             |                           |             |
|          | stack emissions                 | 510                                      | 510                                        |                                           |                                                    |                                             |                                               | 82500                 |             |                           |             |
|          | stack emissions                 | 290                                      | 290                                        |                                           |                                                    |                                             |                                               | 24000                 |             |                           |             |
|          | stack emissions                 | 430                                      | 430                                        |                                           |                                                    |                                             |                                               | 57500                 |             |                           |             |
|          | stack emissions                 | 580                                      | 580                                        |                                           |                                                    |                                             |                                               | 24000                 |             |                           |             |
|          | stack emissions                 | 720                                      | 720                                        |                                           |                                                    |                                             |                                               | 82500                 |             |                           |             |
|          | stack emissions                 | 290                                      | 290                                        |                                           |                                                    |                                             |                                               | 24000                 |             |                           |             |
|          | stack emissions                 | 810                                      | 810                                        |                                           |                                                    |                                             |                                               | 82500                 |             |                           |             |
|          | stack emissions                 | 320                                      | 320                                        |                                           |                                                    |                                             |                                               | 24000                 |             |                           |             |
|          | stack emissions                 | 650                                      | 650                                        |                                           |                                                    |                                             |                                               | 82500                 |             |                           |             |
|          | stack emissions                 | 1500                                     | 1500                                       |                                           |                                                    |                                             |                                               | 24000                 |             |                           |             |
|          | stack emissions                 | 480                                      | 480                                        |                                           |                                                    |                                             |                                               | 82500                 |             |                           |             |
|          | stack emissions                 | 270                                      | 270                                        |                                           |                                                    |                                             |                                               | 82500                 |             |                           |             |
|          | stack emissions                 | 200                                      | 200                                        |                                           |                                                    |                                             |                                               | 82500                 |             |                           |             |
|          | stack emissions                 | 320                                      | 320                                        |                                           |                                                    |                                             |                                               | 82500                 |             |                           |             |
| C        | average plant stack emissions   |                                          |                                            | 501                                       |                                                    |                                             |                                               | 56853                 | 7914,8212   |                           | 4160030     |
|          | inlet filter                    | 25000                                    |                                            |                                           |                                                    |                                             | 25000                                         | 120000                |             |                           |             |
|          | outlet filter - stack emissions | 7300                                     | 7300                                       |                                           |                                                    |                                             |                                               | 120000                |             |                           |             |
|          | ambient air                     | 130                                      |                                            |                                           |                                                    | 130                                         |                                               | 669540                |             |                           |             |
|          | ambient air                     | 100                                      |                                            |                                           |                                                    | 100                                         |                                               | 669540                |             |                           |             |
|          | ambient air                     | 140                                      |                                            |                                           |                                                    | 140                                         |                                               | 669540                |             |                           |             |
|          | ambient air                     | 220                                      |                                            |                                           |                                                    | 220                                         |                                               | 234000                |             |                           |             |
|          | inlet filter                    | 9700                                     |                                            |                                           |                                                    |                                             | 9700                                          | 120000                |             |                           |             |
|          | outlet filter - stack emissions | 12000                                    | 12000                                      |                                           |                                                    |                                             |                                               | 120000                |             |                           |             |
|          | ambient air                     | 160                                      |                                            |                                           |                                                    | 160                                         |                                               | 669540                |             |                           |             |
|          | ambient air                     | 70                                       |                                            |                                           |                                                    | 70                                          |                                               | 669540                |             |                           |             |
|          | ambient air                     | 120                                      |                                            |                                           |                                                    | 120                                         |                                               | 669540                |             |                           |             |
|          | ambient air                     | 81                                       |                                            |                                           |                                                    | 81                                          |                                               | 234000                |             |                           |             |
| D        | average plant stack emissions   |                                          |                                            | 9650                                      |                                                    |                                             |                                               | 120000                | 321666,67   |                           |             |
|          | stack emissions                 | 770                                      | 770                                        |                                           |                                                    |                                             |                                               | 60500                 |             | 80000                     |             |
|          | stack emissions                 | 1050                                     | 1050                                       |                                           |                                                    |                                             |                                               | 60500                 |             |                           |             |
|          | stack emissions                 | 9230                                     | 9230                                       |                                           |                                                    |                                             |                                               | 60500                 |             |                           |             |
|          | stack emissions                 | 37000                                    | 37000                                      |                                           |                                                    |                                             |                                               | 60500                 |             |                           |             |
|          | stack emissions                 | 2450                                     | 2450                                       |                                           |                                                    |                                             |                                               | 60500                 |             |                           |             |
|          | stack emissions                 | 1450                                     | 1450                                       |                                           |                                                    |                                             |                                               | 60500                 |             |                           |             |
|          | stack emissions                 | 8905                                     | 8905                                       |                                           |                                                    |                                             |                                               | 60500                 |             |                           |             |
|          | stack emissions                 | 10400                                    | 10400                                      |                                           |                                                    |                                             |                                               | 60500                 |             |                           |             |
| E        | average plant stack emissions   |                                          |                                            | 8783                                      |                                                    |                                             |                                               | 60500                 | 147599,46   |                           | 58183707    |
|          | stack emissions                 | 14375                                    | 14375                                      |                                           |                                                    |                                             |                                               | 50000                 |             | 80000                     |             |
|          | stack emissions                 | 7790                                     | 7790                                       |                                           |                                                    |                                             |                                               | 50000                 |             |                           |             |
|          | stack emissions                 | 8905                                     | 8905                                       |                                           |                                                    |                                             |                                               | 50000                 |             |                           |             |
|          | stack emissions                 | 9230                                     | 9230                                       |                                           |                                                    |                                             |                                               | 50000                 |             |                           |             |

Table S1b.. Complete raw dataset from bitumen related production sites acquired.

| Plant ID | Emission type                 | all data ou <sub>e</sub> /m <sup>3</sup> | overall stack emissions ouE/m <sup>3</sup> | plants stack emissions ouE/m <sup>3</sup> | fugitive emissions ou <sub>e</sub> /m <sup>3</sup> | ambient air ou <sub>e</sub> /m <sup>3</sup> | plant filters ou <sub>e</sub> /m <sup>3</sup> | Q [m <sup>3</sup> /h] | OER [OUE/s] | Plant capacity [ton/year] | OEF ouE/ton |
|----------|-------------------------------|------------------------------------------|--------------------------------------------|-------------------------------------------|----------------------------------------------------|---------------------------------------------|-----------------------------------------------|-----------------------|-------------|---------------------------|-------------|
| F        | average plant stack emissions |                                          |                                            | 10075                                     |                                                    |                                             |                                               | 50000                 | 139930,56   |                           |             |
|          | stack emissions               | 220                                      | 220                                        |                                           |                                                    |                                             |                                               | 35000                 |             | 206000                    |             |
|          | stack emissions               | 610                                      | 610                                        |                                           |                                                    |                                             |                                               | 35000                 |             |                           |             |
|          | stack emissions               | 1750                                     | 1750                                       |                                           |                                                    |                                             |                                               | 35000                 |             |                           |             |
|          | stack emissions               | 1350                                     | 1350                                       |                                           |                                                    |                                             |                                               | 35000                 |             |                           |             |
|          | stack emissions               | 980                                      | 980                                        |                                           |                                                    |                                             |                                               | 35000                 |             |                           |             |
|          | stack emissions               | 2300                                     | 2300                                       |                                           |                                                    |                                             |                                               | 35000                 |             |                           |             |
|          | loading trucks                | 1750                                     |                                            |                                           | 1750                                               |                                             |                                               | 35000                 |             |                           |             |
|          | loading trucks                | 1550                                     |                                            |                                           | 1550                                               |                                             |                                               | 35000                 |             |                           |             |
|          | loading trucks                | 1400                                     |                                            |                                           | 1400                                               |                                             |                                               | 35000                 |             |                           |             |
| G        | average plant stack emissions |                                          |                                            | 1202                                      |                                                    |                                             |                                               | 35000                 | 11682,87    |                           | 1788500     |
|          | filter                        | 295                                      |                                            |                                           |                                                    |                                             | 295                                           | 35000                 |             |                           |             |
|          | filter                        | 198                                      |                                            |                                           |                                                    |                                             | 198                                           | 35000                 |             |                           |             |
|          | filter                        |                                          |                                            |                                           |                                                    |                                             |                                               | 35000                 |             |                           |             |
|          | filter                        | 695                                      |                                            |                                           |                                                    |                                             | 695                                           | 35000                 |             |                           |             |
| H        | filter                        | 919                                      |                                            |                                           |                                                    |                                             | 919                                           |                       |             |                           |             |
|          | stack emissions               | 1000                                     | 1000                                       |                                           |                                                    |                                             |                                               | 114000                |             | 162000                    |             |
|          | stack emissions               | 6800                                     | 6800                                       |                                           |                                                    |                                             |                                               | 114000                |             |                           |             |
|          | stack emissions               | 3800                                     | 3800                                       |                                           |                                                    |                                             |                                               | 114000                |             |                           |             |
|          | stack emissions               | 3600                                     | 3600                                       |                                           |                                                    |                                             |                                               | 114000                |             |                           |             |
|          | filter                        | 1800                                     |                                            |                                           | 1800                                               |                                             |                                               |                       |             |                           |             |
|          | filter                        | 2100                                     |                                            |                                           | 2100                                               |                                             |                                               |                       |             |                           |             |
| I        | average plant stack emissions |                                          |                                            | 3800                                      |                                                    |                                             |                                               | 114000                | 120333,33   |                           | 23424889    |
|          | stack emissions               | 685                                      | 685                                        |                                           |                                                    |                                             |                                               | 79000                 |             | 157000                    |             |
|          | stack emissions               | 4668                                     | 4668                                       |                                           |                                                    |                                             |                                               | 40000                 |             |                           |             |
|          | loading trucks                | 964                                      |                                            |                                           | 964                                                |                                             |                                               |                       |             |                           |             |
|          | loading trucks                | 1469                                     |                                            |                                           | 1469                                               |                                             |                                               |                       |             |                           |             |
|          | loading trucks                | 1084                                     |                                            |                                           | 1084                                               |                                             |                                               |                       |             |                           |             |
|          | stack emissions               | 1706                                     | 1706                                       |                                           |                                                    |                                             |                                               | 40000                 |             |                           |             |
|          | average plant stack emissions |                                          |                                            | 2353                                      |                                                    |                                             |                                               | 53000                 | 34641       |                           | 6958286     |
| M        | stack emissions               | 3422                                     | 3422                                       | 3422                                      |                                                    |                                             |                                               | 50000                 | 47527,778   | 95000                     | 15777221    |
| N        | stack emissions               | 1750                                     | 1750                                       | 1750                                      |                                                    |                                             |                                               |                       |             |                           |             |
| O        | stack emissions               | 16000                                    | 16000                                      | 16000                                     |                                                    |                                             |                                               |                       |             |                           |             |
| P        | stack emissions               | 13000                                    | 13000                                      | 13000                                     |                                                    |                                             |                                               |                       |             |                           |             |
| Q        | stack emissions               | 800                                      | 800                                        | 800                                       |                                                    |                                             |                                               |                       |             |                           |             |
| R        | stack emissions               | 1400                                     | 1400                                       | 1400                                      |                                                    |                                             |                                               |                       |             |                           |             |
| S        | stack emissions               | 1700                                     | 1700                                       | 1700                                      |                                                    |                                             |                                               |                       |             |                           |             |
| T        | stack emissions               | 1300                                     | 1300                                       | 1300                                      |                                                    |                                             |                                               |                       |             |                           |             |
| U        | stack emissions               | 8700                                     | 8700                                       | 8700                                      |                                                    |                                             |                                               |                       |             |                           |             |
| V        | loading trucks                | 35000                                    |                                            |                                           | 35000                                              |                                             |                                               |                       |             |                           |             |
| W        | stack emissions               | 6500                                     | 6500                                       | 6500                                      |                                                    |                                             |                                               |                       |             |                           |             |
| X        | stack emissions               | 2600                                     | 2600                                       | 2600                                      |                                                    |                                             |                                               |                       |             |                           |             |
| Y        | stack emissions               | 1200                                     | 1200                                       | 1200                                      |                                                    |                                             |                                               |                       |             |                           |             |
| Z        | stack emissions               | 2000                                     | 2000                                       | 2000                                      |                                                    |                                             |                                               |                       |             |                           |             |
| AA       | stack emissions               | 20000                                    | 20000                                      | 20000                                     |                                                    |                                             |                                               |                       |             |                           |             |
| AB       | stack emissions               | 18000                                    | 18000                                      | 18000                                     |                                                    |                                             |                                               |                       |             |                           |             |
| AC       | stack emissions               | 10000                                    | 10000                                      | 10000                                     |                                                    |                                             |                                               |                       |             |                           |             |
| AD       | stack emissions               | 9200                                     | 9200                                       | 9200                                      |                                                    |                                             |                                               |                       |             |                           |             |
| AE       | stack emissions               | 6200                                     | 6200                                       | 6200                                      |                                                    |                                             |                                               |                       |             |                           |             |
| AF       | stack emissions               | 1800                                     | 1800                                       | 1800                                      |                                                    |                                             |                                               |                       |             |                           |             |
| AG       | stack emissions               | 1300                                     | 1300                                       | 1300                                      |                                                    |                                             |                                               |                       |             |                           |             |
| AH       | stack emissions               | 860                                      | 860                                        | 860                                       |                                                    |                                             |                                               |                       |             |                           |             |
| AI       | stack emissions               | 8600                                     | 8600                                       | 8600                                      |                                                    |                                             |                                               |                       |             |                           |             |
| AL       | stack emissions               | 760                                      | 760                                        | 760                                       |                                                    |                                             |                                               |                       |             |                           |             |
| AM       | stack emissions               | 6200                                     | 6200                                       | 6200                                      |                                                    |                                             |                                               |                       |             |                           |             |
| AN       | stack emissions               | 600                                      | 600                                        | 600                                       |                                                    |                                             |                                               |                       |             |                           |             |
| AO       | stack emissions               | 760                                      | 760                                        | 760                                       |                                                    |                                             |                                               |                       |             |                           |             |
| AP       | stack emissions               | 240                                      | 240                                        | 240                                       |                                                    |                                             |                                               |                       |             |                           |             |
| AQ       | stack emissions               | 5200                                     | 5200                                       | 5200                                      |                                                    |                                             |                                               |                       |             |                           |             |
| AR       | stack emissions               | 1700                                     | 1700                                       | 1700                                      |                                                    |                                             |                                               |                       |             |                           |             |
| AS       | stack emissions               | 3800                                     | 3800                                       | 3800                                      |                                                    |                                             |                                               |                       |             |                           |             |
| AT       | stack emissions               | 820                                      | 820                                        | 820                                       |                                                    |                                             |                                               |                       |             |                           |             |
| AU       | stack emissions               | 3600                                     | 3600                                       | 3600                                      |                                                    |                                             |                                               |                       |             |                           |             |
| AV       | stack emissions               | 460                                      | 460                                        | 460                                       |                                                    |                                             |                                               |                       |             |                           |             |
| AW       | stack emissions               | 240                                      | 240                                        | 240                                       |                                                    |                                             |                                               |                       |             |                           |             |
| AX       | stack emissions               | 1000                                     | 1000                                       | 1000                                      |                                                    |                                             |                                               |                       |             |                           |             |
| AY       | stack emissions               | 1500                                     | 1500                                       | 1500                                      |                                                    |                                             |                                               |                       |             |                           |             |
| AZ       | stack emissions               | 960                                      | 960                                        | 960                                       |                                                    |                                             |                                               |                       |             |                           |             |
| BA       | stack emissions               | 860                                      | 860                                        | 860                                       |                                                    |                                             |                                               |                       |             |                           |             |
| BC       | stack emissions               | 1100                                     | 1100                                       | 1100                                      |                                                    |                                             |                                               |                       |             |                           |             |
| n=       |                               | 113                                      | 85                                         | 47                                        | 12                                                 | 10                                          | 6                                             | 70                    | 8           | 7                         | 6           |
